# Supplementary material for: Effects of ligands on (de-)enhancement of plasmonic excitations of silver, gold and bimetallic nanoclusters: TD-DFT+TB calculations
Source: Royal Society of Chemistry journal article supplement (doi:10.1039/d1cp03220h), 2021-01-01
Supplement: d1cp03220h1.pdf [file d1cp03220h1.pdf]

## Supporting Information

### Effects of Ligands on (De-)Enhancement of Plasmonic Excitations of Silver, Gold and Bimetallic NanoClusters: TD-DFT+TB Calculations

Narges Asadi-Aghbolaghi,<sup>a,b,c</sup> Johann Pototschnig,<sup>b</sup> Zahra Jamshidi <sup>\*,c</sup> and Lucas Visscher<sup>\*,b</sup>

<sup>a</sup> Department of Physical Chemistry, Chemistry & Chemical Engineering Research Center of Iran, Tehran, Iran

<sup>b</sup> Division of Theoretical Chemistry, Amsterdam Center for Multiscale Modeling, Vrije Universiteit Amsterdam, The Netherlands

<sup>c</sup> Chemistry Department, Sharif University of Technology, Tehran 11155-9516, Iran

**Table S1** Bonding energy (in eV) based on energy decomposition energy analysis for Au(Ag)–SCH<sub>3</sub> bond in monometallic and bimetallic clusters, and the amount of Hirshfeld transferred charge (in |e|).

| Complex                                                          | <sup>1</sup> $\Delta E_{int}$ | <sup>2</sup> $\Delta V_{elstat}$ | <sup>3</sup> $\Delta E_{oi}$ | <sup>4</sup> $\Delta E_{Pauli}$ | <sup>5</sup> $\Delta q$ |
|------------------------------------------------------------------|-------------------------------|----------------------------------|------------------------------|---------------------------------|-------------------------|
| <b>Ag<sub>20</sub>SCH<sub>3</sub><sup>-1</sup></b>               | -2.61                         | -4.35                            | -2.75                        | +4.49                           | -0.60                   |
| <b>Ag<sub>16</sub>Au<sub>4</sub>SCH<sub>3</sub><sup>-1</sup></b> | -2.94                         | -5.75                            | -4.09                        | +6.90                           | -0.74                   |
| <b>Ag<sub>4</sub>Au<sub>16</sub>SCH<sub>3</sub><sup>-1</sup></b> | -3.02                         | -4.86                            | -2.76                        | +4.60                           | -0.67                   |
| <b>Au<sub>20</sub>SCH<sub>3</sub><sup>-1</sup></b>               | -3.47                         | -6.30                            | -4.14                        | +6.97                           | -0.80                   |

<sup>1</sup>Total bonding energy, <sup>2</sup>Electrostatic attractive energy, <sup>3</sup>Total orbital interactions, <sup>4</sup>Total Pauli repulsion, <sup>5</sup>Hirshfeld transferred charge from ligand to metal cluster.

**Table S2** Splitting the high-intensity excited state of Ag<sub>20</sub> after interaction with SCH<sub>3</sub>.

| <b>Ag<sub>20</sub></b> |                             | <b>Ag<sub>20</sub>SCH<sub>3</sub></b> |                             |
|------------------------|-----------------------------|---------------------------------------|-----------------------------|
| Energy (eV)            | <i>f</i>                    | Energy (eV)                           | <i>f</i>                    |
| 3.89                   | 4.63                        | 3.93                                  | 1.72                        |
| 3.89                   | 4.63                        | 3.94                                  | 0.92                        |
| 3.89                   | 4.63                        | 3.98                                  | 3.28                        |
|                        | <b>Sum <i>f</i> = 13.89</b> | 4.10                                  | 2.42                        |
|                        |                             | 4.14                                  | 3.29                        |
|                        |                             | 4.14                                  | 1.10                        |
|                        |                             |                                       | <b>Sum <i>f</i> = 12.73</b> |

**Table S3** Splitting the excited states of Au<sub>20</sub> (with oscillator strength > 10<sup>-2</sup>) after interaction with SCH<sub>3</sub>.

| Au <sub>20</sub> |                            | Au <sub>20</sub> SCH <sub>3</sub> |                            |
|------------------|----------------------------|-----------------------------------|----------------------------|
| Energy (eV)      | <i>f</i>                   | Energy (eV)                       | <i>f</i>                   |
| 3.2653           | 0.1689                     | 3.13121                           | 4.67E-02                   |
| 3.2653           | 0.1689                     | 3.1558                            | 2.49E-02                   |
| 3.2653           | 0.1689                     | 3.18855                           | 1.34E-02                   |
| 3.4035           | 0.179                      | 3.19227                           | 1.02E-02                   |
| 3.4035           | 0.179                      | 3.20597                           | 3.83E-02                   |
| 3.4035           | 0.179                      | 3.21153                           | 2.85E-02                   |
| 3.50927          | 9.00E-02                   | 3.2491                            | 1.64E-02                   |
| 3.50927          | 9.00E-02                   | 3.26035                           | 2.90E-02                   |
| 3.50927          | 9.00E-02                   | 3.2656                            | 2.79E-02                   |
| 3.61097          | 5.75E-02                   | 3.28621                           | 1.26E-02                   |
| 3.61098          | 5.75E-02                   | 3.29888                           | 2.39E-02                   |
| 3.61098          | 5.75E-02                   | 3.30636                           | 4.12E-02                   |
| 3.66995          | 2.63E-02                   | 3.32427                           | 5.37E-02                   |
| 3.66995          | 2.63E-02                   | 3.34232                           | 7.61E-02                   |
| 3.66995          | 2.63E-02                   | 3.34863                           | 9.97E-02                   |
| 3.83991          | 1.61E-02                   | 3.39001                           | 1.88E-02                   |
| 3.83991          | 1.61E-02                   | 3.44448                           | 2.83E-02                   |
| 3.83991          | 1.61E-02                   | 3.45233                           | 0.2081                     |
| 3.90001          | 3.16E-02                   | 3.46108                           | 2.46E-02                   |
| 3.90001          | 3.16E-02                   | 3.48406                           | 1.21E-02                   |
| 3.90001          | 3.16E-02                   | 3.51251                           | 1.50E-02                   |
| 3.93979          | 1.54E-02                   | 3.52735                           | 4.85E-02                   |
| 3.93979          | 1.54E-02                   | 3.53951                           | 5.10E-02                   |
| 3.93979          | 1.54E-02                   | 3.54513                           | 0.102                      |
| 3.9564           | 1.95E-02                   | 3.54802                           | 5.51E-02                   |
| 3.9564           | 1.95E-02                   | 3.5618                            | 2.34E-02                   |
| 3.9564           | 1.95E-02                   | 3.57082                           | 0.1064                     |
|                  | <b>Sum <i>f</i> = 1.81</b> | 3.5749                            | 6.64E-02                   |
|                  |                            | 3.58493                           | 2.24E-02                   |
|                  |                            | 3.59548                           | 6.65E-02                   |
|                  |                            | 3.60331                           | 8.15E-02                   |
|                  |                            | 3.61291                           | 7.18E-02                   |
|                  |                            | 3.61666                           | 4.20E-02                   |
|                  |                            | 3.62595                           | 2.46E-02                   |
|                  |                            | 3.63713                           | 1.96E-02                   |
|                  |                            | 3.63901                           | 1.35E-02                   |
|                  |                            | 3.64092                           | 1.01E-02                   |
|                  |                            | 3.65498                           | 1.62E-02                   |
|                  |                            | 3.66066                           | 3.74E-02                   |
|                  |                            | 3.7147                            | 0.1288                     |
|                  |                            | 3.72017                           | 1.45E-02                   |
|                  |                            | 3.73067                           | 1.55E-02                   |
|                  |                            | 3.7355                            | 1.54E-02                   |
|                  |                            | 3.75394                           | 1.94E-02                   |
|                  |                            | 3.75599                           | 1.23E-02                   |
|                  |                            | 3.77378                           | 1.73E-02                   |
|                  |                            | 3.82344                           | 1.11E-02                   |
|                  |                            |                                   | <b>Sum <i>f</i> = 1.94</b> |

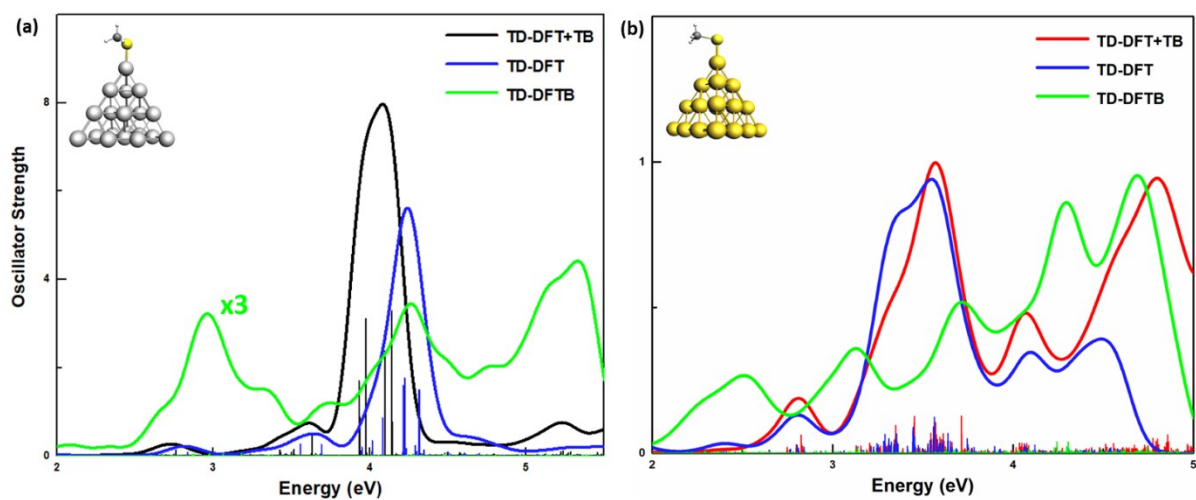

**Figure S1.** Absorption spectra for (a)  $\text{Ag}_{20}\text{SCH}_3$ , (b)  $\text{Au}_{20}\text{SCH}_3$ , with TD-DFT+TB, TD-DFT and TD-DFTB level of theory. Spectra have been broadened with a  $\sigma = 0.2$  eV Gaussian.

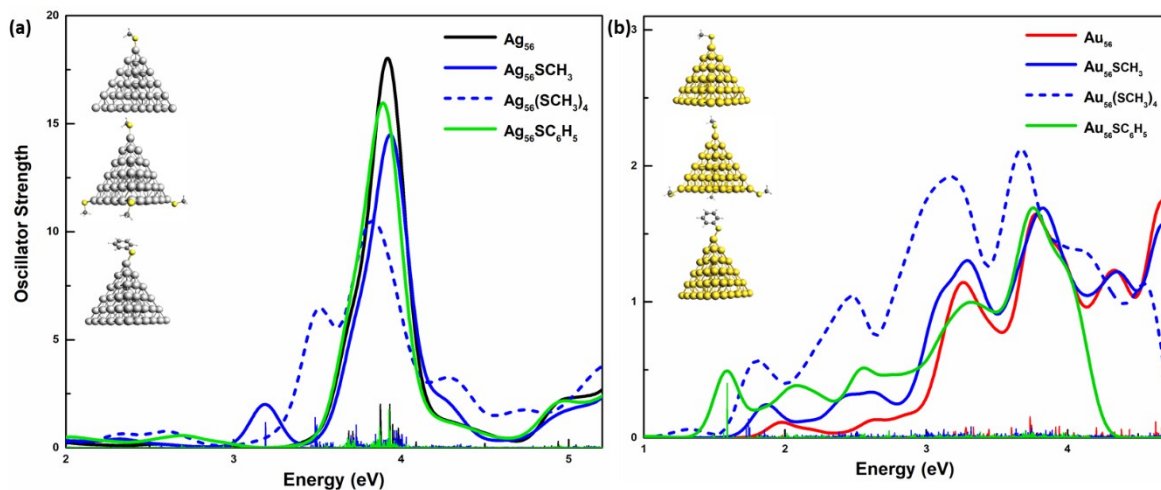

**Figure S2.** Calculated absorption spectra for (a)  $\text{Ag}_{56}$  and (b)  $\text{Au}_{56}$  with  $\text{SCH}_3$  and  $\text{SC}_6\text{H}_5$  ligands. Spectra have been broadened with a  $\sigma = 0.2$  eV Gaussian.

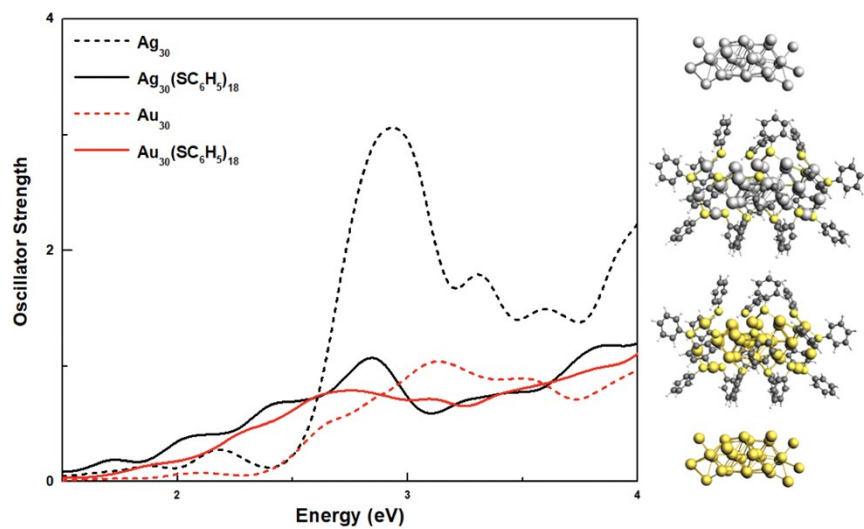

**Figure S3.** Calculated TD-DFT+TB absorption spectra for  $\text{Ag}_{30}$ ,  $\text{Ag}_{30}(\text{SC}_6\text{H}_5)_{18}$ ,  $\text{Au}_{30}$ , and  $\text{Au}_{30}(\text{SC}_6\text{H}_5)_{18}$ . Spectra have been broadened with a  $\sigma = 0.2$  eV Gaussian.

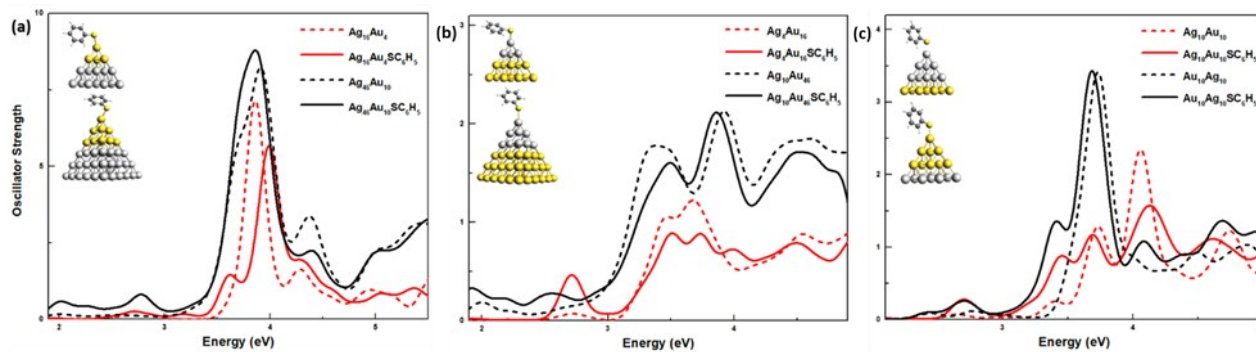

**Figure S4.** Calculated absorption spectra for (a)  $Ag_{16}Au_4SC_6H_5$  and  $Ag_{46}Au_{10}SC_6H_5$  (b)  $Ag_4Au_{16}SC_6H_5$  and  $Ag_{10}Au_{46}SC_6H_5$ , and (c)  $Ag_{10}Au_{10}SC_6H_5$  and  $Au_{10}Ag_{10}SC_6H_5$ . Spectra have been broadened with a  $\sigma = 0.2$  eV Gaussian.

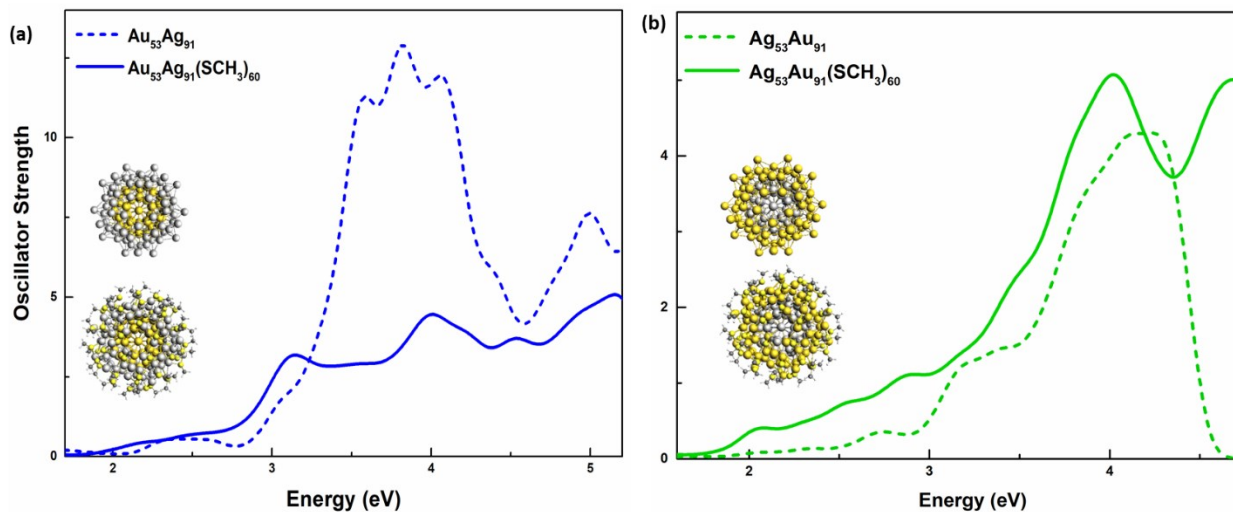

**Figure S5.** Calculated absorption spectra for (a)  $Au_{53}Ag_{91}(SCH_3)_{60}$  and  $Au_{53}Ag_{91}$  (b)  $Ag_{53}Au_{91}(SCH_3)_{60}$  and  $Ag_{53}Au_{91}$ . Spectra have been broadened with a  $\sigma = 0.2$  eV Gaussian.

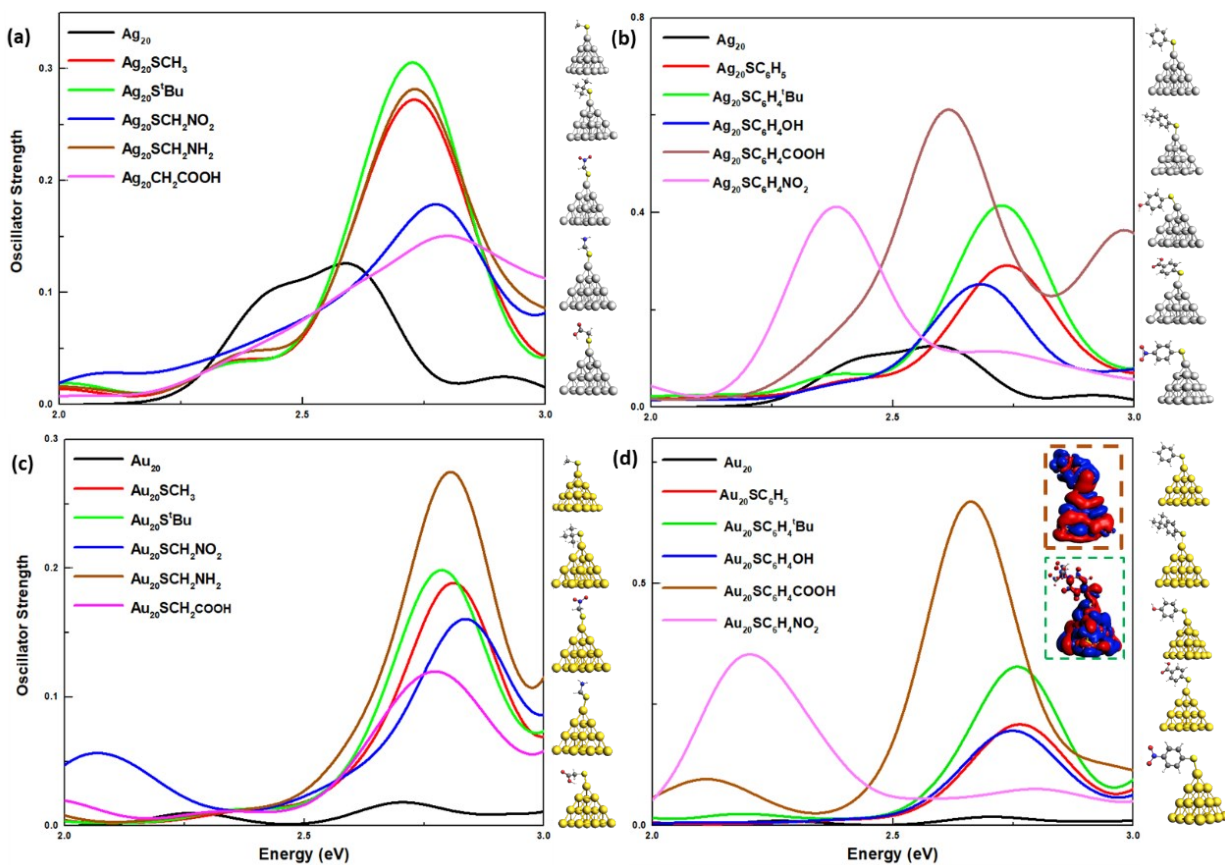

**Figure S6.** Calculated TD-DFT+TB absorption spectra for  $\text{Ag}_{20}$  (a, b) and  $\text{Au}_{20}$  (c, d) with different donor and acceptor functional groups in the range of 2 to 3 eV. Spectra have been broadened with a  $\sigma = 0.2$  eV Gaussian.

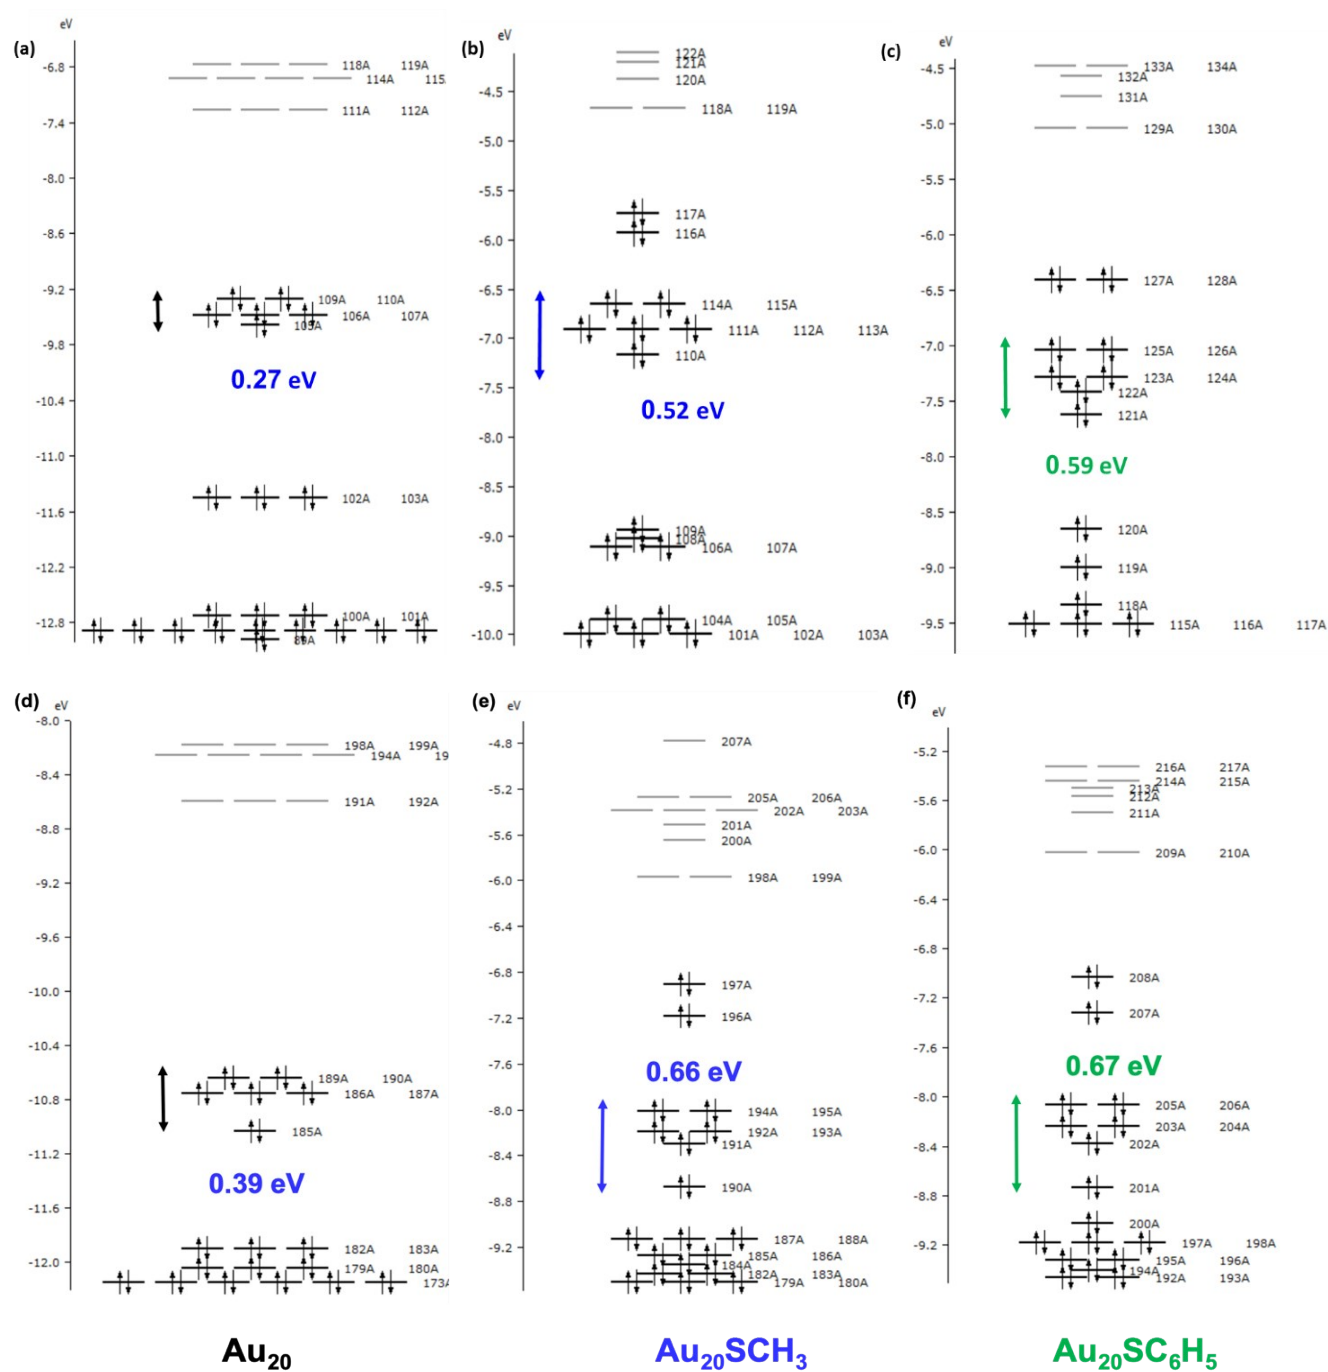

**Figure S7.** Level of energy for molecular orbitals of (a)  $\text{Ag}_{20}$ , (b)  $\text{Ag}_{20}\text{SCH}_3$ , (c)  $\text{Ag}_{20}\text{SC}_6\text{H}_5$ , (d)  $\text{Au}_{20}$ , (e)  $\text{Au}_{20}\text{SCH}_3$ , and (f)  $\text{Au}_{20}\text{SC}_6\text{H}_5$ .
